# Supplementary material
Source: PubMed Central journal article supplement (PMC10071389)
Supplement: jcsm.10414.sm001.pdf [file jcsm.10414.sm001.pdf]

| <b>Baseline Characteristic</b>                                 | <b>No Diabetes (N=126)</b> | <b>Incident Prediabetes (N=143)</b> | <b>Incident Diabetes (N=182)</b> | <b>p value</b>   |
|----------------------------------------------------------------|----------------------------|-------------------------------------|----------------------------------|------------------|
| ESS, [n] mean ± SD                                             | [72] 11.6 ± 6.1            | [73] 11.9 ± 5.6                     | [92] 11.1 ± 5.3                  | 0.66             |
| split, N(%)                                                    | <b>44 (43.6)</b>           | <b>68 (54.0)</b>                    | <b>109 ( 68.1)</b>               | <b>&lt;0.01</b>  |
| Supine Apnea Index, events/h, mean ± SD                        | <b>0.1 ± 0.1</b>           | <b>0.1 ± 0.2</b>                    | <b>0.2 ± 0.4</b>                 | <b>&lt;0.01</b>  |
| CPAP use, N (%)                                                | 41 (32.5)                  | 44 (30.8)                           | 77 (42.3)                        | 0.0639           |
| Respiratory Arousal Index, events/h, mean ± SD                 | <b>16.9 ± 21.0</b>         | <b>22.8 ± 23.0</b>                  | <b>31.9 ± 29.6</b>               | <b>&lt;.0001</b> |
| Spontaneous Arousal Index, events/h, mean ± SD                 | 18.3 ± 14.8                | 16.7 ± 11.4                         | 17.5 ± 11.7                      | 0.556            |
| Total Arousal index, events/h, mean ± SD                       | <b>37.4 ± 26.4</b>         | <b>42.3 ± 26.9</b>                  | <b>50.6 ± 31.8</b>               | <b>&lt;0.01</b>  |
| Snoring Index), events/h, mean ± SD                            | 0.2 ± 0.3                  | 0.3 ± 0.4                           | 0.3 ± 0.5                        | 0.20             |
| Obstructive Apnea Index, events/h, mean ± SD                   | <b>0.2 ± 0.3</b>           | <b>0.3 ± 0.4</b>                    | <b>0.3 ± 0.4</b>                 | <b>0.01</b>      |
| Central Apnea Index, events/h, mean ± SD                       | 1.3 ± 2.7                  | 1.7 ± 4.6                           | 2.1 ± 6.2                        | 0.34             |
| Hypopnea Index, events/h, mean ± SD                            | <b>7.9 ± 11.3</b>          | <b>9.9 ± 11.6</b>                   | <b>12.5 ± 13.9</b>               | <b>&lt;0.01</b>  |
| Cheyne-Stroke Pattern, n (%)                                   | 1 (0.8)                    | 5 (3.5)                             | 10 (5.5)                         | 0.07             |
| PLM index, events/h, mean ± SD                                 | 0.2 ± 0.4                  | 0.2 ± 0.4                           | 0.1 ± 0.3                        | 0.29             |
| Desaturation >4%, mean ± SD                                    | <b>32.1 ± 39.1</b>         | <b>45.3 ± 43.8</b>                  | <b>50.5 ± 45.2</b>               | <b>&lt;0.01</b>  |
| Oxygen Desaturation Nadir, mean ± SD                           | <b>84.7 ± 6.3</b>          | <b>83.3 ± 7.1</b>                   | <b>81.4 ± 7.4</b>                | <b>&lt;0.01</b>  |
| T=60-89%, minutes, mean ± SD                                   | 12.2 ± 36.3                | 12.1 ± 29.9                         | 20.2 ± 43.1                      | 0.08             |
| T=90-99%, minutes, mean ± SD                                   | <b>215.8 ± 123.9</b>       | <b>187.9 ± 121.3</b>                | <b>150.3 ± 105.9</b>             | <b>&lt;.01</b>   |
| Mean Nocturnal Oxygen Saturation, mean ± SD                    | <b>93.5 ± 2.6</b>          | <b>92.9 ± 2.6</b>                   | <b>92.0 ± 4.0</b>                | <b>&lt;0.01</b>  |
| Oxygen at Night utilized during sleep study, liters, mean ± SD | [6] 2.0 ± 0.6              | [4] 2.8 ± 1.5                       | [8] 2.3 ± 0.5                    | 0.39             |
| Chronic Oxygen Use, n (%)                                      | 6 (4.8)                    | 4 (2.9)                             | 9 (5.0)                          | 0.64             |
| Apnea hypopnea index, mean ± SD                                | <b>17.7 ± 22.4</b>         | <b>24.5 ± 27.3</b>                  | <b>30.3 ± 31.5</b>               | <b>&lt;0.01</b>  |

[n] described separately in demographics with missing data, CPAP = continuous positive airway pressure, PLM = periodic limb movement.

| <b>Baseline Characteristic</b>                  | <b>No Diabetes (N=126)</b> | <b>Incident Prediabetes (N=143)</b> | <b>Incident Diabetes (N=182)</b> | <b>p value</b> |
|-------------------------------------------------|----------------------------|-------------------------------------|----------------------------------|----------------|
| Age, (n) mean ± SD, years                       | 56.9 ± 12.6                | 57.5 ± 12.4                         | 56.2 ± 10.6                      | 0.63           |
| Employment, N (%)                               |                            |                                     |                                  | 0.69           |
| *Unemployed                                     | 42 (33.3)                  | 44 (30.8)                           | 70 (38.5)                        |                |
| *Employed                                       | 54 (42.9)                  | 63 (44.1)                           | 72 (39.6)                        |                |
| *Retired                                        | 30 (23.8)                  | 36 (25.2)                           | 40 (22.0)                        |                |
| Race, N (%)                                     |                            |                                     |                                  | 0.64           |
| *White                                          | 96 (76.2)                  | 115 (80.4)                          | 141 (77.5)                       |                |
| *Black                                          | 16 (12.7)                  | 17 (11.9)                           | 28 (15.4)                        |                |
| *Hispanic or Other                              | 14 (11.1)                  | 11 (7.7)                            | 13 (7.1)                         |                |
| Calculated BMI, [n] mean ± SD                   | <b>[121] 31.5 ± 5.5</b>    | <b>[135] 32.7 ± 6.6</b>             | <b>[173] 35.8 ± 6.8</b>          | <b>&lt;.01</b> |
| Pulmonary Disease, N (%)                        |                            |                                     |                                  |                |
| *Chronic Pulmonary Disease                      | 42 (33.3)                  | 43 (30.3)                           | 50 (27.5)                        | 0.54           |
| *Pulmonary Hypertension                         | 4 (3.2)                    | 3 (2.1)                             | 6 (3.3)                          | 0.83           |
| Alternative to CPAP, N (%)                      |                            |                                     |                                  |                |
| *ENT intervention                               | 1 (0.8)                    | 0 (0.0)                             | 0 (0.0)                          | 0.28           |
| *MAD intervention                               | 0 (0.0)                    | 1 (0.7)                             | 0 (0.0)                          | 0.60           |
| Prednisone (Oral Steroids), N (%)               | 2 (1.6)                    | 6 (4.2)                             | 6 (3.3)                          | 0.49           |
| Betablockers, N (%)                             | 36 (28.6)                  | 46 (32.2)                           | 47 (25.8)                        | 0.45           |
| Antihistamines (H2 Blocker), N (%)              | 9 (7.1)                    | 11 (7.7)                            | 22 (12.1)                        | 0.36           |
| Muscle Relaxants (Neuro-muscle relaxant), N (%) | 12 (9.5)                   | 7 (4.9)                             | 10 (5.5)                         | 0.24           |
